# Supplementary material for: Acceptance of Insect-Based Food Products in Western Societies: A Systematic Review
Source: PubMed Central journal article supplement (PMC8901202; doi:10.3389/fnut.2021.759885), 2022-02-21
Supplement: Data_Sheet_3.pdf [file Data_Sheet_3.pdf]

## **Acceptance of Insect-Based Foodstuff in Western Societies: A Systematic Review and Comprehensive Update**

### **Search string Scopus:**

(TITLE-ABS-KEY(accept\* OR willing\* OR consum\* OR intention)) AND (TITLE-ABS-KEY("edible insects" OR "edible insect" OR "entomophagy" OR "consume insects" OR "eating insects" OR "insect-based" OR "insects as food" OR "insect food")) AND ( LIMIT-TO ( PUBSTAGE,"final" ) ) AND ( LIMIT-TO ( DOCTYPE,"ar" ) ) AND ( LIMIT-TO ( LANGUAGE,"English" ) )

Results: 603

### **Search string Web of Science:**

(TS=(accept\* OR willing\* OR consum\* OR intention)) AND (TS=("edible insects" OR "edible insect" OR "entomophagy" OR "consume insects" OR "eating insects" OR "insect-based" OR "insects as food" OR "insect food"))

Restrict: English, Article

Results: 579

### **Search string Science Direct:**

(acceptance OR willingness OR consumption) AND ("edible insects" OR "entomophagy" OR "consume insects" OR "eating insects" OR "insect-based" OR "insect food")

Restrict: Research Article

Results: 862

### **Search string JSTOR:**

((("edible insect\*" OR "entomophagy" OR "consume insects" OR "eating insects" OR "insect-based" OR "insects as food" OR "insect food")) AND ((accept\* OR willing\* OR consum\* OR intention))) AND la:(eng OR en)

Restrict: Article, Journal

Results: 2.122

Imported: 1000

### **Search string Google Scholar:**

(acceptance OR willingness OR consumption OR intention) AND ("edible insects" OR "entomophagy" OR "consume insects" OR "eating insects" OR "insect-based" OR "insect food")

Restrict: English

Results: 16.600

Imported: 1000
